# Supplementary material
Source: Research Square preprint supplement (doi:10.21203/rs.3.rs-8757524/v1)
Supplement: Supplementary file 1 [file 1d9c04de9c165e942caccce1.xlsx]

## Sheet: genus level
Table S1.1 Venn diagram of bacterial species with genus level
a&b&c	a&b	b&c	a&c	b	c	a
g__norank_f__norank_o__norank_c__AT-s3-28	g__norank_f__norank_o__AKIW659	g__norank_f__norank_o__Elev-16S-573	g__Blastococcus	g__norank_f__norank_o__Elev-16S-1166	g__Abditibacterium	g__unclassified_o__Corynebacteriales
g__Acidipila	g__Edaphobacter	g__unclassified_c__Blastocatellia	g__unclassified_f__Propionibacteriaceae	g__norank_f__norank_o__Subgroup_12	g__Dietzia	g__Brachybacterium
g__norank_f__Acidobacteriaceae_Subgroup_1	g__Granulicella	g__unclassified_o__Vicinamibacterales	g__Sinosporangium	g__norank_f__norank_o__norank_c__Subgroup_21	g__Leifsonia	g__norank_f__norank_o__norank_c__WCHB1-81
g__unclassified_f__Acidobacteriaceae_Subgroup_1	g__norank_f__norank_o__Aminicenantales	g__unclassified_c__Vicinamibacteria	g__JCM_18997	g__norank_f__Propionibacteriaceae	g__Leucobacter	g__norank_f__norank_o__Fimbriimonadales
g__Candidatus_Koribacter	g__Tellurimicrobium	g__unclassified_f__Ilumatobacteraceae	g__Patulibacter	g__Thermobifida	g__unclassified_f__Thermomonosporaceae	g__Filimonas
g__norank_f__norank_o__Acidobacteriales	g__norank_f__norank_o__norank_c__Subgroup_19	g__Corynebacterium	g__unclassified_f__Solirubrobacteraceae	g__unclassified_o__Streptosporangiales	g__Armatimonas	g__Siphonobacter
g__unclassified_o__Acidobacteriales	g__norank_f__norank_o__Actinomarinales	g__unclassified_f__Sporichthyaceae	g__Pseudoflavitalea	g__norank_f__norank_o__OPB41	g__norank_f__norank_o__Bacteroidetes_VC2.1_Bac22	g__Pontibacter
g__Bryobacter	g__Sporichthya	g__norank_f__norank_o__PeM15	g__Sediminibacterium	g__norank_f__norank_o__norank_c__DG-56	g__Flaviaesturariibacter	g__Leadbetterella
g__norank_f__norank_o__PAUC26f	g__Demequina	g__Mumia	g__Candidatus_Amoebophilus	g__norank_f__Bacteroidetes_vadinHA17	g__norank_f__Spirosomaceae	g__Myroides
g__Candidatus_Solibacter	g__Intrasporangium	g__Haloactinopolyspora	g__Pedobacter	g__BSV13	g__unclassified_f__Sphingobacteriaceae	g__unclassified_o__Sphingobacteriales
g__norank_f__norank_o__Subgroup_13	g__Ruania	g__unclassified_o__Propionibacteriales	g__unclassified_c__Dehalococcoidia	g__Niabella	g__unclassified_c__Oligoflexia	g__norank_f__norank_o__ADurb.Bin180
g__norank_f__norank_o__Subgroup_15	g__Saccharomonospora	g__Saccharopolyspora	g__norank_f__norank_o__B10-SB3A	g__Niveitalea	g__Candidatus_Chloroploca	g__Nostoc_PCC-7107
g__norank_f__norank_o__Subgroup_2	g__Fluviicola	g__Parviterribacter	g__unclassified_o__Ktedonobacterales	g__Segetibacter	g__unclassified_f__Thermomicrobiaceae	g__norank_f__Phormidiaceae
g__Paludibaculum	g__norank_f__norank_o__SM1A07	g__Parasegetibacter	g__Leptolyngbya_Es-Yyy1000	g__OLB12	g__Chlorogloeopsis_PCC-7518	g__Leptolyngbya_PCC-6306
g__unclassified_c__Acidobacteriae	g__Mucilaginibacter	g__Dyadobacter	g__norank_f__norank_o__norank_c__BRH-c20a	g__unclassified_f__Crocinitomicaceae	g__HAVOmat113	g__unclassified_f__Leptolyngbyaceae
g__norank_f__norank_o__11-24	g__unclassified_c__Anaerolineae	g__UTCFX1	g__Caldibacillus	g__unclassified_o__Ignavibacteriales	g__TG-45	g__norank_f__Vampirovibrionaceae
g__Aridibacter	g__CENA533	g__norank_f__Ardenticatenaceae	g__unclassified_o__Entomoplasmatales	g__JdFR-76	g__unclassified_c__Cyanobacteriia	g__Desulfovibrio
g__Blastocatella	g__Vampirovibrio	g__OLB13	g__Clostridium_sensu_stricto_14	g__Anaerolinea	g__unclassified_f__Obscuribacteraceae	g__Desulfovirga
g__JGI_0001001-H03	g__norank_f__UBA12411	g__unclassified_f__Chloroflexaceae	g__unclassified_f__Garciellaceae	g__norank_f__norank_o__SJA-15	g__Deinococcus	g__norank_f__norank_o__norank_c__Lineage_IIc
g__Stenotrophobacter	g__Geobacter	g__unclassified_c__Chloroflexia	g__Alkalibaculum	g__norank_f__norank_o__Elev-1554	g__Kyrpidia	g__unclassified_f__Planococcaceae
g__norank_f__Blastocatellaceae	g__Geothermobacter	g__norank_f__norank_o__SAR202_clade	g__Lachnotalea	g__Dehalogenimonas	g__norank_f__norank_o__Clostridiales	g__Polycladomyces
g__unclassified_f__Blastocatellaceae	g__ZOR0006	g__Cylindrospermum_PMC238.04	g__unclassified_f__Ruminococcaceae	g__norank_f__norank_o__MVP-21	g__unclassified_f__Anaerovoracaceae	g__unclassified_o__Clostridiales
g__norank_f__norank_o__DS-100	g__Haloplasma	g__Fischerella_PCC-9339	g__norank_f__UCG-010	g__Pantalinema	g__Anaerospora	g__unclassified_f__Oscillospiraceae
g__RB41	g__unclassified_f__Thermoactinomycetaceae	g__norank_f__Nostocaceae	g__Clostridioides	g__unclassified_p__Cyanobacteria	g__Cystobacter	g__unclassified_o__Oscillospirales
g__Geothrix	g__norank_f__norank_o__norank_c__Bacilli	g__unclassified_o__Cyanobacteriales	g__norank_f__norank_o__Peptostreptococcales-Tissierellales	g__norank_f__norank_o__norank_c__norank_p__DTB120	g__norank_f__norank_o__Candidatus_Komeilibacteria	g__Paraclostridium
g__norank_f__norank_o__Subgroup_7	g__Sporobacter	g__JSC-12	g__unclassified_f__Thermacetogeniaceae	g__norank_f__norank_o__Desulfobulbales	g__norank_f__norank_o__Candidatus_Zambryskibacteria	g__unclassified_f__norank_o__Peptostreptococcales-Tissierellales
g__norank_f__norank_o__norank_c__Subgroup_11	g__Desulfitobacterium	g__Leptolyngbya_ANT.L52.2	g__norank_f__norank_o__UASB-TL25	g__unclassified_o__Desulfobulbales	g__Inquilinus	g__Candidatus_Dichloromethanomonas
g__norank_f__norank_o__norank_c__Subgroup_18	g__Desulfotomaculum	g__unclassified_o__Oxyphotobacteria_Incertae_Sedis	g__norank_f__norank_o__norank_c__Gracilibacteria	g__Desulfomonile	g__unclassified_o__Elsterales	g__norank_f__norank_o__norank_c__Limnochordia
g__norank_f__norank_o__norank_c__Subgroup_20	g__norank_f__norank_o__Desulfotomaculales	g__norank_f__norank_o__Gastranaerophilales	g__norank_f__norank_o__Candidatus_Staskawiczbacteria	g__unclassified_o__norank_c__Desulfuromonadia	g__unclassified_f__Micropepsaceae	g__unclassified_c__Negativicutes
g__norank_f__norank_o__norank_c__Subgroup_22	g__Moorella	g__norank_f__norank_o__Lineage_IV	g__norank_f__norank_o__Candidatus_Yanofskybacteria	g__Syntrophobacter	g__Chthonobacter	g__Syntrophomonas
g__norank_f__norank_o__norank_c__Subgroup_25	g__norank_f__norank_o__Symbiobacteriales	g__BBMC-4	g__Acidisoma	g__Syntrophorhabdus	g__unclassified_o__Rickettsiales	g__Syntrophothermus
g__norank_f__norank_o__norank_c__Subgroup_5	g__Sh765B-TzT-35	g__norank_f__norank_o__Izemoplasmatales	g__Rhodovastum	g__unclassified_p__Desulfobacterota	g__norank_f__Zavarziniaceae	g__Thermoanaerobacterium
g__Subgroup_10	g__norank_f__Eel-36e1D6	g__Lihuaxuella	g__norank_f__URHD0088	g__Paenisporosarcina	g__norank_f__Burkholderiaceae	g__Brockia
g__norank_f__norank_o__Subgroup_17	g__unclassified_f__Sandaracinaceae	g__Pasteuria	g__Candidatus_Captivus	g__Thermicanus	g__Chitinimonas	g__Aggregicoccus
g__norank_f__norank_o__Subgroup_9	g__unclassified_p__Myxococcota	g__Clostridium_sensu_stricto_15	g__Phreatobacter	g__Epulopiscium	g__Chitinivorax	g__norank_f__norank_o__Candidatus_Azambacteria
g__Luteitalea	g__norank_f__norank_o__Candidatus_Peribacteria	g__Garciella	g__unclassified_f__Geminicoccaceae	g__norank_f__Ethanoligenenaceae	g__norank_f__norank_o__norank_c__norank_p__Sva0485	g__norank_f__norank_o__Candidatus_Vogelbacteria
g__Vicinamibacter	g__norank_f__norank_o__Candidatus_Doudnabacteria	g__unclassified_f__Lachnospiraceae	g__Vogesella	g__Paludicola	g__norank_f__norank_o__Omnitrophales	g__norank_f__Hyphomonadaceae
g__norank_f__Vicinamibacteraceae	g__norank_f__AKAU3564_sediment_group	g__unclassified_o__Lachnospirales	g__Ottowia	g__norank_f__Peptostreptococcaceae	g__IMCC26134	g__Chelatococcus
g__norank_f__norank_o__Vicinamibacterales	g__CL500-3	g__Ruminococcus	g__Candidatus_Nitrotoga	g__norank_f__norank_o__M55-D21	g__Verruc-01	g__norank_f__Beijerinckiaceae
g__unclassified_p__Acidobacteriota	g__unclassified_f__Gemmataceae	g__unclassified_f__Peptostreptococcaceae	g__Noviherbaspirillum	g__Pelosinus		g__norank_f__Rhizobiaceae
g__norank_f__norank_o__IMCC26256	g__unclassified_p__Planctomycetota	g__Gottschalkia	g__Serratia	g__unclassified_f__Sporomusaceae		g__Candidatus_Jidaibacter
g__Iamia	g__norank_f__norank_o__norank_c__vadinHA49	g__Desulfurispora	g__Tahibacter	g__norank_f__norank_o__Veillonellales-Selenomonadales		g__Alcaligenes
g__CL500-29_marine_group	g__norank_f__Arenicellaceae	g__norank_f__Dethiobacteraceae	g__norank_f__Xanthomonadaceae	g__unclassified_f__Longimicrobiaceae		g__norank_f__Hydrogenophilaceae
g__Ilumatobacter	g__Candidimonas	g__norank_f__norank_o__Limnochordales	g__unclassified_f__Chlamydiaceae	g__Nannocystis		g__norank_f__Cellvibrionaceae
g__norank_f__Ilumatobacteraceae	g__Aquabacterium	g__norank_f__norank_o__MBA03	g__norank_f__Parachlamydiaceae	g__norank_f__norank_o__Candidatus_Buchananbacteria		g__Psychrobacter
g__IMCC26207	g__Rubrivivax	g__unclassified_o__Myxococcales	g__norank_f__Methylacidiphilaceae	g__norank_f__norank_o__Candidatus_Collierbacteria		g__unclassified_f__Pseudomonadaceae
g__norank_f__Microtrichaceae	g__norank_f__Gallionellaceae	g__norank_f__Nannocystaceae		g__norank_f__norank_o__Candidatus_Levybacteria		g__unclassified_o__Xanthomonadales
g__norank_f__norank_o__Microtrichales	g__unclassified_f__Gallionellaceae	g__Polyangium		g__Urania-1B-19_marine_sediment_group		g__Spirochaeta
g__unclassified_o__Microtrichales	g__GOUTA6	g__norank_f__norank_o__Candidatus_Pacebacteria		g__Tundrisphaera		g__Ga0074140
g__norank_f__norank_o__norank_c__Acidimicrobiia	g__oc32	g__norank_f__norank_o__norank_c__Microgenomatia		g__unclassified_f__Azospirillaceae		g__Waddlia
g__unclassified_c__Acidimicrobiia	g__Azoarcus	g__norank_f__norank_o__norank_c__norank_p__Patescibacteria		g__unclassified_f__Devosiaceae
g__Actinospica	g__Propionivibrio	g__norank_f__Azospirillaceae		g__norank_f__Hyphomicrobiaceae
g__Catenulispora	g__norank_f__Rhodocyclaceae	g__Psychroglaciecola		g__Mesorhizobium
g__Mycobacterium	g__Porticoccus	g__unclassified_f__Rhizobiales_Incertae_Sedis		g__Xanthobacter
g__Nocardia	g__norank_f__Enterobacteriaceae	g__Rhodobacter		g__norank_f__Rhodobacteraceae
g__Rhodococcus	g__norank_f__norank	g__unclassified_o__Rhodospirillales		g__Telmatospirillum
g__Smaragdicoccus	g__unclassified_f__Chthoniobacteraceae	g__Sphingoaurantiacus		g__norank_f__Fokiniaceae
g__Acidothermus	g__norank_f__norank_o__S-BQ2-57_soil_group	g__Geminicoccus		g__unclassified_f__Rickettsiaceae
g__Jatrophihabitans	g__Luteolibacter	g__Limnobacter		g__Hephaestia
g__Antricoccus		g__norank_f__Nitrosomonadaceae		g__Lautropia
g__Geodermatophilus		g__norank_f__Oxalobacteraceae		g__Formivibrio
g__Modestobacter		g__norank_f__norank_o__CCM19a		g__Thiobacillus
g__unclassified_f__Geodermatophilaceae		g__Cellvibrio		g__norank_f__Neisseriaceae
g__Nakamurella		g__unclassified_f__Woeseiaceae		g__Thauera
g__Longivirga		g__Spirochaeta_2		g__Uliginosibacterium
g__norank_f__Sporichthyaceae		g__Estrella		g__unclassified_o__Enterobacterales
g__norank_f__norank_o__Frankiales		g__Parachlamydia		g__unclassified_f__Legionellaceae
g__unclassified_o__Frankiales		g__Terrimicrobium		g__Methylomicrobium
g__Angustibacter		g__Lacunisphaera		g__Ketobacter
g__unclassified_f__Kineosporiaceae				g__Alkanindiges
g__Cellulomonas				g__Panacagrimonas
g__Flexivirga				g__norank_f__norank_o__norank_c__Sumerlaeia
g__unclassified_f__Dermacoccaceae				g__norank_f__Criblamydiaceae
g__Phycicoccus				g__norank_f__norank_o__WCHB1-41
g__unclassified_f__Intrasporangiaceae				g__LD29
g__Agromyces				g__Alterococcus
g__Microbacterium
g__unclassified_f__Microbacteriaceae
g__Arthrobacter
g__Sinomonas
g__Actinoplanes
g__Allocatelliglobosispora
g__Dactylosporangium
g__Hamadaea
g__Longispora
g__Luedemannella
g__Micromonospora
g__Salinispora
g__Virgisporangium
g__norank_f__Micromonosporaceae
g__unclassified_f__Micromonosporaceae
g__Actinopolymorpha
g__Kribbella
g__Marmoricola
g__Nocardioides
g__unclassified_f__Nocardioidaceae
g__Microlunatus
g__Actinomycetospora
g__Amycolatopsis
g__Crossiella
g__Lechevalieria
g__Pseudonocardia
g__unclassified_f__Pseudonocardiaceae
g__Kitasatospora
g__Streptomyces
g__Nonomuraea
g__Sphaerisporangium
g__Streptosporangium
g__Thermopolyspora
g__unclassified_f__Streptosporangiaceae
g__Actinoallomurus
g__Actinocorallia
g__Actinomadura
g__Thermobispora
g__Thermostaphylospora
g__norank_f__Thermomonosporaceae
g__unclassified_c__Actinobacteria
g__norank_f__norank_o__norank_c__MB-A2-108
g__Rubrobacter
g__Gaiella
g__norank_f__norank_o__Gaiellales
g__unclassified_o__Gaiellales
g__norank_f__67-14
g__Conexibacter
g__Solirubrobacter
g__norank_f__Solirubrobacteraceae
g__unclassified_o__Solirubrobacterales
g__norank_f__norank_o__norank_c__Thermoleophilia
g__unclassified_c__Thermoleophilia
g__unclassified_p__Actinobacteriota
g__norank_f__norank_o__Armatimonadales
g__Chthonomonas
g__norank_f__norank_o__Chthonomonadales
g__norank_f__Fimbriimonadaceae
g__norank_f__norank_o__norank_c__norank_p__Armatimonadota
g__norank_f__37-13
g__Arachidicoccus
g__Aurantisolimonas
g__Chitinophaga
g__Dinghuibacter
g__Edaphobaculum
g__Ferruginibacter
g__Flavihumibacter
g__Flavisolibacter
g__Flavitalea
g__Lacibacter
g__Niastella
g__Parafilimonas
g__Puia
g__Taibaiella
g__Terrimonas
g__UTBCD1
g__norank_f__Chitinophagaceae
g__unclassified_f__Chitinophagaceae
g__norank_f__Saprospiraceae
g__norank_f__norank_o__Chitinophagales
g__unclassified_o__Chitinophagales
g__Cytophaga
g__Sporocytophaga
g__Adhaeribacter
g__Chryseolinea
g__Ohtaekwangia
g__norank_f__Microscillaceae
g__unclassified_f__Microscillaceae
g__Flavobacterium
g__norank_f__NS9_marine_group
g__Chryseobacterium
g__norank_f__AKYH767
g__norank_f__KD3-93
g__norank_f__NS11-12_marine_group
g__Pelobium
g__Solitalea
g__Sphingobacterium
g__norank_f__env.OPS_17
g__unclassified_c__Bacteroidia
g__norank_f__norank_o__Kapabacteriales
g__norank_f__BSV26
g__norank_f__Balneolaceae
g__norank_f__norank_o__norank_c__SJA-28
g__Peredibacter
g__Bdellovibrio
g__OM27_clade
g__norank_f__norank_o__0319-6G20
g__Oligoflexus
g__norank_f__norank_o__Oligoflexales
g__norank_f__norank_o__norank_c__AD3
g__norank_f__Anaerolineaceae
g__norank_f__norank_o__Ardenticatenales
g__norank_f__norank_o__C10-SB1A
g__Litorilinea
g__norank_f__Caldilineaceae
g__norank_f__norank_o__RBG-13-54-9
g__norank_f__A4b
g__norank_f__norank_o__SBR1031
g__norank_f__norank_o__norank_c__Anaerolineae
g__Chloronema
g__FFCH7168
g__Oscillochloris
g__Herpetosiphon
g__Kouleothrix
g__norank_f__Roseiflexaceae
g__unclassified_f__Roseiflexaceae
g__norank_f__AKIW781
g__norank_f__AKYG1722
g__norank_f__JG30-KF-CM45
g__Nitrolancea
g__Sphaerobacter
g__unclassified_o__Thermomicrobiales
g__norank_f__norank_o__S085
g__norank_f__norank_o__norank_c__Gitt-GS-136
g__norank_f__norank_o__norank_c__JG30-KF-CM66
g__norank_f__norank_o__norank_c__KD4-96
g__norank_f__norank_o__C0119
g__norank_f__JG30-KF-AS9
g__1959-1
g__FCPS473
g__norank_f__Ktedonobacteraceae
g__unclassified_f__Ktedonobacteraceae
g__norank_f__norank_o__norank_c__OLB14
g__norank_f__norank_o__norank_c__P2-11E
g__norank_f__norank_o__norank_c__SHA-26
g__norank_f__norank_o__norank_c__TK10
g__unclassified_p__Chloroflexi
g__norank_f__norank_o__Chloroplast
g__Chroococcidiopsis_PCC_7203
g__Phormidium_SAG_81.79
g__Tolypothrix
g__unclassified_f__Nostocaceae
g__norank_f__norank_o__Cyanobacteriales
g__EcFYyy-200
g__Leptolyngbya_EcFYyyy-00
g__norank_f__unclassified_o__Oxyphotobacteria_Incertae_Sedis
g__norank_f__norank_o__norank_c__Sericytochromatia
g__norank_f__Obscuribacteraceae
g__norank_f__norank_o__Vampirovibrionales
g__unclassified_o__Vampirovibrionales
g__norank_f__norank_o__Dadabacteriales
g__Deferrisoma
g__Truepera
g__norank_f__Babeliaceae
g__norank_f__UBA12409
g__norank_f__Vermiphilaceae
g__norank_f__norank_o__Babeliales
g__unclassified_o__Babeliales
g__unclassified_f__Desulfocapsaceae
g__Citrifermentans
g__norank_f__Geobacteraceae
g__unclassified_f__Geobacteraceae
g__norank_f__norank_o__PB19
g__norank_f__norank_o__norank_c__norank_p__Desulfobacterota
g__norank_f__norank_o__MVP-88
g__norank_f__norank_o__norank_c__Lineage_IIa
g__norank_f__norank_o__norank_c__Lineage_IIb
g__norank_f__Entotheonellaceae
g__norank_f__norank_o__norank_c__norank_p__FCPU426
g__possible_genus_04
g__Alicyclobacillus
g__Effusibacillus
g__Tumebacillus
g__Aneurinibacillus
g__Aeribacillus
g__Anoxybacillus
g__Aureibacillus
g__Bacillus
g__Cerasibacillus
g__Fictibacillus
g__Geobacillus
g__Gracilibacillus
g__Halobacillus
g__Oceanobacillus
g__Pseudogracilibacillus
g__Sinibacillus
g__Terribacillus
g__Ureibacillus
g__Virgibacillus
g__norank_f__Bacillaceae
g__unclassified_f__Bacillaceae
g__norank_f__Marinococcaceae
g__Domibacillus
g__Lysinibacillus
g__Rummeliibacillus
g__Solibacillus
g__Sporosarcina
g__Pullulanibacillus
g__Sporolactobacillus
g__Tuberibacillus
g__unclassified_f__Sporolactobacillaceae
g__unclassified_o__Bacillales
g__Brevibacillus
g__Caldalkalibacillus
g__norank_f__type_III
g__Erysipelatoclostridium
g__Turicibacter
g__Ammoniibacillus
g__Ammoniphilus
g__Cohnella
g__Paenibacillus
g__Thermobacillus
g__norank_f__Paenibacillaceae
g__unclassified_f__Paenibacillaceae
g__Baia
g__Hazenella
g__Kroppenstedtia
g__Laceyella
g__Melghirimyces
g__Novibacillus
g__Planifilum
g__Risungbinella
g__Shimazuella
g__Thermoactinomyces
g__Thermoflavimicrobium
g__norank_f__Thermoactinomycetaceae
g__unclassified_c__Bacilli
g__Caldicoprobacter
g__Fonticella
g__norank_f__Caloramatoraceae
g__unclassified_f__Caloramatoraceae
g__Clostridium_sensu_stricto_1
g__Clostridium_sensu_stricto_10
g__Clostridium_sensu_stricto_11
g__Clostridium_sensu_stricto_12
g__Clostridium_sensu_stricto_13
g__Clostridium_sensu_stricto_16
g__Clostridium_sensu_stricto_18
g__Clostridium_sensu_stricto_19
g__Clostridium_sensu_stricto_2
g__Clostridium_sensu_stricto_3
g__Clostridium_sensu_stricto_5
g__Clostridium_sensu_stricto_6
g__Clostridium_sensu_stricto_8
g__Clostridium_sensu_stricto_9
g__unclassified_f__Clostridiaceae
g__Oxobacter
g__Irregularibacter
g__Anaerocolumna
g__Anaerosporobacter
g__Herbinix
g__Lachnoclostridium
g__Mobilitalea
g__norank_f__Lachnospiraceae
g__Caproiciproducens
g__norank_f__Peptococcaceae
g__Anaerovorax
g__Romboutsia
g__Sporacetigenium
g__Proteiniborus
g__Sedimentibacter
g__Alkaliphilus
g__Anaerosalibacter
g__Tepidimicrobium
g__Tissierella
g__unclassified_o__Peptostreptococcales-Tissierellales
g__norank_f__norank_o__Proteinivoracales
g__Thermincola
g__Lutispora
g__unclassified_f__Gracilibacteraceae
g__Anaerobacterium
g__HN-HF0106
g__Hungateiclostridium
g__Pseudoclostridium
g__Ruminiclostridium
g__Thermoclostridium
g__norank_f__Hungateiclostridiaceae
g__unclassified_f__Hungateiclostridiaceae
g__unclassified_c__Clostridia
g__Desulfosporosinus
g__norank_f__Heliobacteriaceae
g__norank_f__Desulfallas-Sporotomaculum
g__Desulfofarcimen
g__Desulfohalotomaculum
g__Pelotomaculum
g__Dethiobacter
g__Limnochorda
g__norank_f__Limnochordaceae
g__Hydrogenispora
g__Anaerosinus
g__Sporomusa
g__norank_f__Sporomusaceae
g__norank_f__norank_o__norank_c__Negativicutes
g__norank_f__Sulfobacillaceae
g__Symbiobacterium
g__norank_f__Symbiobacteraceae
g__unclassified_f__Symbiobacteraceae
g__Syntrophaceticus
g__Thermaerobacter
g__Tepidanaerobacter
g__norank_f__norank_o__norank_c__norank_p__Firmicutes
g__unclassified_p__Firmicutes
g__norank_f__norank_o__norank_c__norank_p__GAL15
g__norank_f__norank_o__norank_c__AKAU4049
g__norank_f__norank_o__norank_c__BD2-11_terrestrial_group
g__Gemmatimonas
g__Roseisolibacter
g__norank_f__Gemmatimonadaceae
g__unclassified_f__Gemmatimonadaceae
g__YC-ZSS-LKJ147
g__norank_f__Longimicrobiaceae
g__norank_f__norank_o__norank_c__S0134_terrestrial_group
g__Halocella
g__norank_f__Halobacteroidaceae
g__norank_f__Hydrogenedensaceae
g__norank_f__Latescibacteraceae
g__norank_f__norank_o__norank_c__norank_p__Latescibacterota
g__norank_f__norank_o__norank_c__norank_p__MBNT15
g__norank_f__WX65
g__norank_f__norank_o__Rokubacteriales
g__Anaeromyxobacter
g__Archangium
g__Corallococcus
g__KD3-10
g__Myxococcus
g__P3OB-42
g__norank_f__Myxococcaceae
g__unclassified_f__Myxococcaceae
g__Vulgatibacter
g__norank_f__norank_o__Blfdi19
g__norank_f__norank_o__FFCH16767
g__Haliangium
g__unclassified_f__Nannocystaceae
g__norank_f__BIrii41
g__Phaselicystis
g__Minicystis
g__Pajaroellobacter
g__Sorangium
g__norank_f__Polyangiaceae
g__unclassified_f__Polyangiaceae
g__Sandaracinus
g__norank_f__Sandaracinaceae
g__unclassified_o__Polyangiales
g__norank_f__norank_o__mle1-27
g__unclassified_c__Polyangia
g__norank_f__norank_o__norank_c__bacteriap25
g__norank_f__norank_o__norank_c__norank_p__NB1-j
g__norank_f__norank_o__norank_c__4-29-1
g__Leptospirillum
g__Nitrospira
g__norank_f__norank_o__norank_c__Thermodesulfovibrionia
g__norank_f__norank_o__Candidatus_Kuenenbacteria
g__norank_f__norank_o__Candidatus_Magasanikbacteria
g__unclassified_c__ABY1
g__norank_f__norank_o__norank_c__Berkelbacteria
g__norank_f__norank_o__norank_c__Dojkabacteria
g__norank_f__norank_o__Candidatus_Abawacabacteria
g__norank_f__norank_o__Candidatus_Peregrinibacteria
g__norank_f__norank_o__norank_c__Kazania
g__norank_f__norank_o__Candidatus_Woesebacteria
g__norank_f__norank_o__Candidatus_Jorgensenbacteria
g__norank_f__norank_o__Candidatus_Kaiserbacteria
g__norank_f__norank_o__Candidatus_Moranbacteria
g__norank_f__norank_o__norank_c__Parcubacteria
g__unclassified_c__Parcubacteria
g__norank_f__LWQ8
g__TM7
g__TM7a
g__unclassified_f__Saccharimonadaceae
g__norank_f__WWH38
g__norank_f__norank_o__Saccharimonadales
g__unclassified_o__Saccharimonadales
g__norank_f__norank_o__norank_c__WWE3
g__unclassified_p__Patescibacteria
g__norank_f__norank_o__norank_c__BD7-11
g__norank_f__norank_o__norank_c__OM190
g__AKYG587
g__SM1A02
g__norank_f__Phycisphaeraceae
g__norank_f__norank_o__norank_c__Pla3_lineage
g__norank_f__norank_o__norank_c__Pla4_lineage
g__norank_f__Gemmataceae
g__Aquisphaera
g__Isosphaera
g__Paludisphaera
g__Singulisphaera
g__norank_f__Isosphaeraceae
g__unclassified_f__Isosphaeraceae
g__norank_f__norank_o__norank_c__Planctomycetes
g__Acidicaldus
g__Craurococcus-Caldovatus
g__Roseomonas
g__norank_f__Acetobacteraceae
g__unclassified_f__Acetobacteraceae
g__Azospirillum
g__Skermanella
g__norank_f__norank_o__Azospirillales
g__Candidatus_Nucleicultrix
g__Asticcacaulis
g__Brevundimonas
g__Caulobacter
g__Phenylobacterium
g__norank_f__Caulobacteraceae
g__unclassified_f__Caulobacteraceae
g__Hirschia
g__SWB02
g__Defluviicoccus
g__norank_f__norank_o__Defluviicoccales
g__Dongia
g__norank_f__Elsteraceae
g__norank_f__norank_o__Elsterales
g__Ferrovibrio
g__norank_f__Holosporaceae
g__norank_f__Fodinicurvataceae
g__norank_f__Micavibrionaceae
g__norank_f__norank_o__Micavibrionales
g__unclassified_o__Micavibrionales
g__Micropepsis
g__norank_f__Micropepsaceae
g__Candidatus_Paracaedibacter
g__Reyranella
g__norank_f__Reyranellaceae
g__norank_f__A0839
g__norank_f__Amb-16S-1323
g__Bosea
g__Camelimonas
g__FFCH5858
g__Methylobacterium-Methylorubrum
g__Methylovirgula
g__Microvirga
g__Neo-b11
g__Roseiarcus
g__alphaI_cluster
g__unclassified_f__Beijerinckiaceae
g__norank_f__D05-2
g__Devosia
g__Hyphomicrobium
g__Pedomicrobium
g__unclassified_f__Hyphomicrobiaceae
g__norank_f__KF-JG30-B3
g__Kaistia
g__Labrys
g__norank_f__Methyloligellaceae
g__unclassified_f__Pleomorphomonadaceae
g__Allorhizobium-Neorhizobium-Pararhizobium-Rhizobium
g__Ensifer
g__Pseudaminobacter
g__unclassified_f__Rhizobiaceae
g__Bauldia
g__Nordella
g__norank_f__Rhizobiales_Incertae_Sedis
g__Rhodomicrobium
g__Bradyrhizobium
g__Pseudolabrys
g__Pseudorhodoplanes
g__Rhodoplanes
g__Rhodopseudomonas
g__Starkeya
g__norank_f__Xanthobacteraceae
g__unclassified_f__Xanthobacteraceae
g__norank_f__norank_o__Rhizobiales
g__unclassified_o__Rhizobiales
g__Amaricoccus
g__Limibaculum
g__Rubellimicrobium
g__unclassified_f__Rhodobacteraceae
g__norank_f__Magnetospiraceae
g__Magnetospirillum
g__norank_f__Magnetospirillaceae
g__norank_f__Rhodospirillaceae
g__norank_f__norank_o__Rhodospirillales
g__norank_f__AB1
g__norank_f__Mitochondria
g__norank_f__SM2D12
g__Altererythrobacter
g__Ellin6055
g__Novosphingobium
g__Sphingobium
g__Sphingomonas
g__Sphingopyxis
g__unclassified_f__Sphingomonadaceae
g__Arboricoccus
g__Candidatus_Alysiosphaera
g__norank_f__Geminicoccaceae
g__norank_f__norank_o__norank_c__Alphaproteobacteria
g__unclassified_c__Alphaproteobacteria
g__norank_f__norank_o__211ds20
g__Sulfurifustis
g__Marinobacter
g__norank_f__A21b
g__Achromobacter
g__Bordetella
g__Castellaniella
g__Eoetvoesia
g__Pusillimonas
g__Verticiella
g__unclassified_f__Alcaligenaceae
g__norank_f__B1-7BS
g__Burkholderia-Caballeronia-Paraburkholderia
g__Cupriavidus
g__Ralstonia
g__unclassified_f__Burkholderiaceae
g__Pseudogulbenkiania
g__unclassified_f__Chromobacteriaceae
g__Acidovorax
g__Comamonas
g__Hydrogenophaga
g__Ideonella
g__Methylibium
g__Pelomonas
g__Ramlibacter
g__Rhizobacter
g__unclassified_f__Comamonadaceae
g__Sideroxydans
g__MM2
g__norank_f__Methylophilaceae
g__unclassified_f__Methylophilaceae
g__966-1
g__Ellin6067
g__IS-44
g__MND1
g__Nitrosomonas
g__Nitrosospira
g__mle1-7
g__Massilia
g__Pseudoduganella
g__unclassified_f__Oxalobacteraceae
g__Azospira
g__Azovibrio
g__Georgfuchsia
g__unclassified_f__Rhodocyclaceae
g__norank_f__SC-I-84
g__norank_f__Sutterellaceae
g__norank_f__TRA3-20
g__norank_f__norank_o__Burkholderiales
g__unclassified_o__Burkholderiales
g__norank_f__norank_o__CCD24
g__Marinimicrobium
g__OM60NOR5_clade
g__BD1-7_clade
g__Coxiella
g__Aquicella
g__norank_f__Diplorickettsiaceae
g__norank_f__norank_o__EC3
g__norank_f__norank_o__EPR3968-O8a-Bc78
g__Enterobacter
g__Pantoea
g__Acidibacter
g__Candidatus_Berkiella
g__Candidatus_Ovatusbacter
g__norank_f__unclassified
g__norank_f__norank_o__JG36-GS-52
g__norank_f__norank_o__KF-JG30-C25
g__norank_f__norank_o__KI89A_clade
g__Legionella
g__Methylocaldum
g__norank_f__Methylococcaceae
g__Nitrococcus
g__Candidatus_Nitrosoglobus
g__Nitrosococcus
g__Alcanivorax
g__Halomonas
g__norank_f__norank_o__PLTA13
g__Acinetobacter
g__Cavicella
g__norank_f__Moraxellaceae
g__Pseudomonas
g__norank_f__norank_o__R7C24
g__Alkanibacter
g__Polycyclovorans
g__Steroidobacter
g__norank_f__Steroidobacteraceae
g__JTB255_marine_benthic_group
g__Ahniella
g__Chujaibacter
g__Dokdonella
g__Dyella
g__Frateuria
g__Luteibacter
g__Mizugakiibacter
g__Rhodanobacter
g__norank_f__Rhodanobacteraceae
g__unclassified_f__Rhodanobacteraceae
g__Arenimonas
g__Luteimonas
g__Lysobacter
g__Pseudoxanthomonas
g__Stenotrophomonas
g__Thermomonas
g__unclassified_f__Xanthomonadaceae
g__norank_f__norank_o__norank_c__Gammaproteobacteria
g__unclassified_c__Gammaproteobacteria
g__unclassified_p__Proteobacteria
g__norank_f__norank_o__norank_c__norank_p__RCP2-54
g__norank_f__norank_o__norank_c__norank_p__SAR324_cladeMarine_group_B
g__Turneriella
g__Salinispira
g__Sumerlaea
g__Candidatus_Protochlamydia
g__Neochlamydia
g__unclassified_f__Parachlamydiaceae
g__norank_f__Simkaniaceae
g__unclassified_f__Simkaniaceae
g__norank_f__cvE6
g__unclassified_o__Chlamydiales
g__Candidatus_Omnitrophus
g__Candidatus_Udaeobacter
g__Chthoniobacter
g__Candidatus_Xiphinematobacter
g__Opitutus
g__ADurb.Bin063-1
g__Ellin516
g__norank_f__Pedosphaeraceae
g__unclassified_f__Pedosphaeraceae
g__Roseimicrobium
g__norank_f__Verrucomicrobiaceae
g__norank_f__norank_o__norank_c__norank_p__WPS-2
g__norank_f__norank_o__norank_c__norank_p__WS2
g__norank_f__norank_o__norank_c__norank_p__WS4
g__norank_f__norank_o__norank_c__norank_p__Zixibacteria
g__unclassified_k__norank_d__Bacteria

## Sheet: phylum level
Table S1.2 Venn diagram of bacterial species with phylum level
a&b&c	a&b	c	b
p__Acidobacteriota	p__TX1A-33	p__Abditibacteriota	p__Calditrichota
p__Actinobacteriota		p__Sva0485	p__DTB120
p__Armatimonadota
p__Bacteroidota
p__Bdellovibrionota
p__Chloroflexi
p__Cyanobacteria
p__Dadabacteria
p__Deferrisomatota
p__Deinococcota
p__Dependentiae
p__Desulfobacterota
p__Elusimicrobiota
p__Entotheonellaeota
p__FCPU426
p__Fibrobacterota
p__Firmicutes
p__GAL15
p__Gemmatimonadota
p__Halanaerobiaeota
p__Hydrogenedentes
p__Latescibacterota
p__MBNT15
p__Methylomirabilota
p__Myxococcota
p__NB1-j
p__Nitrospirota
p__Patescibacteria
p__Planctomycetota
p__Proteobacteria
p__RCP2-54
p__SAR324_cladeMarine_group_B
p__Spirochaetota
p__Sumerlaeota
p__Verrucomicrobiota
p__WPS-2
p__WS2
p__WS4
p__Zixibacteria
p__unclassified_k__norank_d__Bacteria
