# Supplementary material
Source: Research Square preprint supplement (doi:10.21203/rs.3.rs-8757524/v1)
Supplement: Supplementary file 2 [file 92abb5f1e8053eced4ea3e4f.xlsx]

## Sheet: genus level
Table S2.1 Venn diagram of fungal species with genus level
a&b&c	a&b	b&c	a&c	b	c	a
g__Macrophomina	g__Microdiplodia	g__Lasiodiplodia	g__Paraphelidium	g__Aplosporella	g__Neodevriesia	g__Jahnula
g__Cladosporium	g__Pseudocercospora	g__Stagonosporopsis	g__Aureobasidium	g__Pseudoteratosphaeria	g__Teratosphaeriopsis	g__Epicoccum
g__Cercospora	g__Pyrenochaetopsis	g__Tetraplosphaeria	g__Cladophialophora	g__Biatriospora	g__unclassified_f__Teratosphaeriaceae	g__Paracamarosporium
g__Arthrographis	g__Bimuria	g__Spiromastix	g__Arachniotus	g__Spegazzinia	g__unclassified_o__Capnodiales	g__Tremateia
g__unclassified_f__Eremomycetaceae	g__unclassified_f__Phaeosphaeriaceae	g__unclassified_c__Eurotiomycetes	g__Bactrodesmium	g__Lophiostoma	g__unclassified_f__Arthopyreniaceae	g__Nigrograna
g__Xylomyces	g__Edenia	g__Sclerotinia	g__unclassified_f__Halosphaeriaceae	g__Stagonospora	g__Palmiascoma	g__unclassified_c__Dothideomycetes
g__Minutisphaera	g__unclassified_f__Pleosporales_fam_Incertae_sedis	g__unclassified_o__Helotiales	g__Xylaria	g__Ophiosphaerella	g__Corynespora	g__unclassified_f__Herpotrichiellaceae
g__Arthopyrenia	g__unclassified_f__Onygenaceae	g__Eleutherascus	g__Phialemoniopsis	g__Pithomyces	g__Exserohilum	g__Eupenicillium
g__unclassified_f__Cucurbitariaceae	g__Chalara	g__unclassified_f__Sarcosomataceae	g__Calvatia	g__unclassified_f__Pleosporaceae	g__Pseudorobillarda	g__Rasamsonia
g__Didymella	g__Leuconeurospora	g__unclassified_o__Conioscyphales	g__Pluteus	g__unclassified_f__Sporormiaceae	g__Torula	g__Apinisia
g__Phoma	g__Scutellinia	g__unclassified_f__Clavicipitaceae	g__Athelia	g__unclassified_f__Tetraplosphaeriaceae	g__Trematosphaeria	g__unclassified_o__Onygenales
g__unclassified_f__Didymellaceae	g__unclassified_f__Dipodascaceae	g__Engyodontium	g__unclassified_o__Boletales	g__Myrmaecium	g__Spissiomyces	g__Oidiodendron
g__Neokalmusia	g__Coniochaeta	g__Rectifusarium	g__Flavodon	g__unclassified_f__Gymnoascaceae	g__Rhinocladiella	g__Millerozyma
g__Paraconiothyrium	g__Conioscypha	g__Striatibotrys	g__Porostereum	g__unclassified_o__Pyxidiophorales	g__Veronaea	g__unclassified_f__Valsaceae
g__Pseudopithomyces	g__Metarhizium	g__Lophotrichus	g__Sporidiobolus	g__Phialocephala	g__Knufia	g__Lectera
g__Poaceascoma	g__Ustilaginoidea	g__Savoryella	g__Solicoccozyma	g__unclassified_f__Orbiliaceae	g__Neogymnomyces	g__Arxiella
g__Acrocalymma	g__Pleiocarpon	g__Immersiella	g__Pseudozyma	g__Rhexoacrodictys	g__Patinella	g__Madurella
g__Periconia	g__Alfaria	g__unclassified_f__Lasiosphaeriaceae	g__Angulomyces	g__unclassified_o__Diaporthales	g__Tetracladium	g__Pestalotiopsis
g__Phaeosphaeriopsis	g__Mycoleptodiscus	g__Heterochaete	g__Gaertneriomyces	g__Stachylidium	g__Dictyochaeta	g__Zygosporium
g__Alternaria	g__Aniptodera	g__Gyrodontium		g__Paecilomyces	g__unclassified_f__Coniochaetaceae	g__Micropsalliota
g__Cochliobolus	g__Scopulariopsis	g__Ceratorhiza		g__Cylindrium	g__Diaporthe	g__Bovista
g__Curvularia	g__Yunnania	g__Waitea		g__Atractium	g__Rotiferophthora	g__unclassified_f__Lycoperdaceae
g__Dokmaia	g__Phaeoisaria	g__Trametes		g__Cylindrocarpon	g__Haematonectria	g__Phlebopus
g__Microsphaeropsis	g__Trichocladium	g__Phlebia		g__Cymostachys	g__Nectria	g__Botryobasidium
g__Polyschema	g__Cordana	g__Scopuloides		g__Melanopsamma	g__Corollospora	g__Hydnochaete
g__Preussia	g__Leucocoprinus	g__Lentinus		g__Striaticonidium	g__Phialemonium	g__Hymenochaete
g__Westerdykella	g__Clitopilus	g__unclassified_o__Sebacinales		g__unclassified_f__Savoryellaceae	g__Dichotomopilus	g__Oxyporus
g__Roussoella	g__Psilocybe	g__unclassified_f__Chionosphaeraceae		g__Myceliophthora	g__Jugulospora	g__unclassified_o__Hymenochaetales
g__unclassified_o__Pleosporales	g__Auricularia	g__Vishniacozyma		g__Podospora	g__Conlarium	g__Pseudolagarobasidium
g__Boerlagiomyces	g__unclassified_f__Exidiaceae	g__unclassified_o__Rhizophydiales		g__Schizothecium	g__Annulohypoxylon	g__Antrodia
g__Helicoma	g__unclassified_o__Auriculariales	g__unclassified_o__GS11		g__Wongia	g__Podosordaria	g__unclassified_f__Ganodermataceae
g__Ochroconis	g__Pisolithus			g__Apiospora	g__Agaricus	g__Phlebiopsis
g__Scolecobasidium	g__Phaeophlebiopsis			g__Bartalinia	g__Scleroderma	g__unclassified_f__Meruliaceae
g__unclassified_f__Sympoventuriaceae	g__unclassified_f__Thelephoraceae			g__Eutypella	g__Rhizoctonia	g__Earliella
g__Cyphellophora	g__unclassified_c__Cystobasidiomycetes			g__Neopestalotiopsis	g__Phellinus	g__Tinctoporellus
g__Exophiala	g__Hannaella			g__Daldinia	g__Peniophorella	g__Phlebiella
g__unclassified_f__Trichomeriaceae	g__Tetragoniomyces			g__Jumillera	g__Fomitopsis	g__unclassified_f__Peniophoraceae
g__unclassified_o__Chaetothyriales	g__Trichosporon			g__Lepiota	g__Grammothele	g__unclassified_o__Russulales
g__Aspergillus	g__unclassified_f__Chytridiaceae			g__Entoloma	g__Sistotremastrum	g__Tomentella
g__Hamigera	g__unclassified_c__Lobulomycetes			g__unclassified_o__Agaricales	g__Filobasidium	g__unclassified_c__Exobasidiomycetes
g__Penicillium	g__Acaulospora			g__Pseudomerulius	g__Allomyces	g__Calcarisporiella
g__Phialosimplex	g__unclassified_f__Glomeraceae			g__Ceratobasidium	g__unclassified_f__Powellomycetaceae	g__Septoglomus
g__unclassified_f__Aspergillaceae	g__Acaulopage			g__unclassified_o__Corticiales	g__Triparticalcar	g__unclassified_o__GS24
g__Thermoascus				g__Phallus	g__unclassified_f__Spizellomycetaceae	g__Syncephalis
g__Sagenomella				g__Amyloporia	g__Sanchytrium
g__Talaromyces				g__Bjerkandera
g__Thermomyces				g__Podoscypha
g__unclassified_o__Eurotiales				g__Megasporoporia
g__Emmonsiellopsis				g__Junghuhnia
g__Gymnascella				g__unclassified_o__Polyporales
g__Chrysosporium				g__unclassified_o__Atractiellales
g__Malbranchea				g__Leucosporidium
g__Pyxidiophora				g__Kwoniella
g__Chaetomella				g__Cutaneotrichosporon
g__Scytalidium				g__Phlyctochytrium
g__Pseudeurotium				g__unclassified_f__Acaulosporaceae
g__Arthrobotrys				g__Glomus
g__Orbilia				g__Coemansia
g__Ascobolus				g__unclassified_o__GS08
g__Iodophanus
g__unclassified_f__Pyronemataceae
g__Trichaleurina
g__Geotrichum
g__Vanderwaltozyma
g__Candida
g__unclassified_o__Branch06
g__unclassified_f__Chaetosphaeriaceae
g__Lecythophora
g__unclassified_o__Coniochaetales
g__Melanconiella
g__Colletotrichum
g__Gibellulopsis
g__Plectosphaerella
g__Sodiomyces
g__Verticillium
g__Clonostachys
g__Hypomyces
g__Trichoderma
g__Acremonium
g__Chlamydocillium
g__Emericellopsis
g__Sarocladium
g__Campylocarpon
g__Corallomycetella
g__Fusarium
g__Fusicolla
g__Gibberella
g__Neocosmospora
g__Paracremonium
g__Thelonectria
g__unclassified_f__Nectriaceae
g__Purpureocillium
g__unclassified_f__Ophiocordycipitaceae
g__Myrothecium
g__Stachybotrys
g__unclassified_f__Stachybotryaceae
g__unclassified_o__Hypocreales
g__Acaulium
g__Kernia
g__Microascus
g__Parascedosporium
g__Pseudallescheria
g__Scedosporium
g__unclassified_f__Microascaceae
g__Myrmecridium
g__Acrophialophora
g__Chaetomium
g__Corynascella
g__Humicola
g__Melanocarpus
g__Mycothermus
g__Thielavia
g__Zopfiella
g__unclassified_f__Chaetomiaceae
g__Cercophora
g__Cladorrhinum
g__Echria
g__unclassified_f__Sordariaceae
g__Ramophialophora
g__Remersonia
g__Staphylotrichum
g__unclassified_o__Sordariales
g__Distoseptispora
g__Nigrospora
g__Arthrinium
g__Peroneutypa
g__Microdochium
g__Hypoxylon
g__Neoidriella
g__unclassified_o__Xylariales
g__unclassified_c__Sordariomycetes
g__unclassified_p__Ascomycota
g__Chlorophyllum
g__Conocybe
g__Gymnopilus
g__Lycoperdon
g__Fibulochlamys
g__Coprinellus
g__Coprinopsis
g__Parasola
g__Psathyrella
g__Schizophyllum
g__unclassified_f__Stephanosporaceae
g__Arrhenia
g__Serpula
g__unclassified_f__Ceratobasidiaceae
g__Ganoderma
g__Loweporus
g__Phanerochaete
g__Steccherinum
g__Peniophora
g__Serendipita
g__Trechispora
g__unclassified_c__Agaricomycetes
g__Cystobasidium
g__Sakaguchia
g__Spencerozyma
g__Rhodosporidiobolus
g__Rhodotorula
g__Tausonia
g__Papiliotrema
g__Cryptococcus_f__Tremellaceae
g__Saitozyma
g__unclassified_o__Tremellales
g__Apiotrichum
g__Cintractia
g__Dirkmeia
g__Moesziomyces
g__Ustilago
g__Wallemia
g__unclassified_p__Basidiomycota
g__Paraphysoderma
g__unclassified_c__GS13
g__Rhizophlyctis
g__Spizellomyces
g__unclassified_p__Chytridiomycota
g__Entrophospora
g__Funneliformis
g__unclassified_o__Glomerales
g__Paraglomus
g__unclassified_o__Paraglomerales
g__unclassified_p__Glomeromycota
g__Ramicandelaber
g__Mortierella
g__unclassified_p__Mortierellomycota
g__Olpidium
g__unclassified_p__Rozellomycota
g__unclassified_f__Piptocephalidaceae
g__unclassified_k__Fungi

## Sheet: phylum level
Table S2.2 Venn diagram of fungal species wtih phylum level
ABC	AC	A	C
p__Ascomycota	p__Aphelidiomycota	p__Calcarisporiellomycota	p__Calcarisporiellomycota
p__Basidiomycota
p__Blastocladiomycota
p__Chytridiomycota
p__Glomeromycota
p__Kickxellomycota
p__Mortierellomycota
p__Olpidiomycota
p__Rozellomycota
p__Zoopagomycota
p__unclassified_k__Fungi
